# Supplementary material
Source: ML conference proceedings conference paper supplement (https://proceedings.neurips.cc/paper_files/paper/2023/hash/b2169d573d75ff90c7b12dc3a5fc2898-Abstract.html)
Supplement: Supplementary file 1 [file b2169d573d75ff90c7b12dc3a5fc2898-Supplemental-Conference.zip]

Archive with 2 entries (2 files):
- QuantSR_supp/NeurIPS_2023_QuantSR_supp.pdf
- QuantSR_supp/QuantSR_code.zip
